1 **Comparison of DNA metabarcoding and morphological identification for stream macroinvertebrate**  
2 **biodiversity assessment and monitoring**

3 Joeselle M. Serrana\*, Yo Miyake, Maribet Gamboa, Kozo Watanabe

4 Department of Civil and Environmental Engineering, Ehime University, Bunkyo-cho 3, Matsuyama, 790-8577,  
5 Japan

6 \*corresponding author: joeselle.ms@gmail.com

7 Department of Civil and Environmental Engineering, Ehime University  
8 Bunkyo-cho 3, Matsuyama, 790-8577, Japan  
9 Phone & FAX: +81 (0) 89 927 984

10 **Abstract**

11 Conventional morphology-based identification is commonly used for routine assessment of freshwater  
12 ecosystems. However, cost and time efficient techniques such as high-throughput sequencing (HTS) based  
13 approaches may resolve the constraints encountered in conducting morphology-based surveys. Here, we  
14 characterized stream macroinvertebrate species diversity and community composition via metabarcoding and  
15 morphological analysis from environmental samples collected from the Shigenobu River Basin in Ehime  
16 Prefecture, Japan. We compared diversity metrics and assessed both approaches' ability to evaluate the  
17 relationship between macroinvertebrate community and environmental variables. In total, we morphologically  
18 identified 45 taxa (3 families, six subfamilies, 31 genera, and five species) from 8,276 collected individuals  
19 from ten study sites. We detected 44 species by metabarcoding, with 35 species collapsed into 11 groups  
20 matching the morphologically identified taxa. A significant positive correlation between logged depth (number  
21 of HTS reads) and abundance of morphological taxa was observed, which implied that quantitative data can  
22 be used for subsequent analyses. Relatively higher estimates of alpha diversity were calculated from the  
23 metabarcoding data in comparison to morphology-based data. However, beta diversity estimates between  
24 metabarcoding and morphology data based on both incidence and abundance-based matrices were  
25 correlated proving that community differences between sampling sites were preserved in the molecular data.  
26 Also, both models were significant, but metabarcoding data (93%) explained a relatively higher percentage of  
27 variation in the relationship between community composition and the environmental variables than  
28 morphological data (91%). Overall, we present both the feasibility and limitations of HTS-driven estimations  
29 of taxonomic richness, community composition, and diversity metrics, and that metabarcoding was proven  
30 comparable and more sensitive against morphology-based analysis for stream macroinvertebrate biodiversity  
31 assessment and environmental monitoring.

32 *Keywords:* macroinvertebrates, metabarcoding, high-throughput sequencing, read abundance, biomonitoring,  
33 community composition

## 34 1. Introduction

35 Reliable and comprehensive, but rapid and cost-effective methods for monitoring freshwater ecosystems are  
36 encouraged due to the increasing threats of biological degradation faced by freshwaters worldwide (Carrizo  
37 et al., 2017). Since many ecological processes, stream characteristics and nutrient concentrations are  
38 important determinants of macroinvertebrate community composition (Heino, 2014; Shearer et al., 2015),  
39 macroinvertebrates have been the most commonly used focal groups for biological monitoring of the  
40 environmental quality of freshwater ecosystems (Menezes et al., 2010). They serve as good indicators of  
41 ecosystem health due to their high diversity, and different sensitivity to a range of natural and anthropogenic  
42 disturbances, which has been used to develop biotic indices for extensive monitoring programs (Aylagas et  
43 al., 2016).

44 Conventional morphological analysis is most commonly used in routine monitoring programs evaluating  
45 environmental quality changes. However, this is not only time consuming but has serious issues with accuracy,  
46 and consistency in the level of taxonomic identification that highly depends on taxonomic expertise (Hajibabaei  
47 et al., 2011). Specifically, small organisms such as the larval stages of stream macroinvertebrates frequently  
48 used for river biomonitoring are often difficult or impossible to identify at finer taxonomic resolution (e.g.,  
49 species level) (Sweeny et al., 2011). A promising alternative approach is DNA metabarcoding - a combination  
50 of amplicon-based high-throughput sequencing (HTS) analysis and DNA taxonomy (Hebert et al., 2003). High-  
51 throughput amplicon sequencing can process large number of individuals simultaneously and in parallel (Thudi  
52 et al., 2012) making it faster and cheaper than the conventional Sanger sequencing (Voelkerding et al., 2009).  
53 Following a comprehensive read processing step, most metabarcoding pipelines carry out taxonomic  
54 assignments by comparing clustered reads or operational taxonomic units (OTUs) to a reference sequence  
55 database such as Genbank (Benson et al., 2012) and the Barcode of Life Data System (BOLD) (Ratnasingham  
56 and Hebert, 2007). Metabarcoding promises cost-effective and quicker assessments with more  
57 comprehensive and verifiable taxonomic identification that is less reliant on taxonomic expertise (Baird and  
58 Hajibabaei, 2012; Yu et al., 2012; Emilson et al., 2017).

59 The application of HTS-based approaches for biodiversity assessments has been rapidly expanding across a  
60 wide range of fields, including the biomonitoring of stream macroinvertebrates (Baird and Hajibabaei, 2012;  
61 Beng et al., 2016). Previous studies have assessed the ability of DNA metabarcoding to identify  
62 macroinvertebrate communities in parallel to morphology-based identification. DNA metabarcoding provides  
63 broader taxonomic coverage and finer resolving power (Soininen et al., 2015). Hence, species that may exhibit  
64 diverse environmental responses would have a higher chance of detection benefiting study systems that  
65 require species-level identification (Elbrecht et al, 2017; Carew et al., 2018). With this advantage, DNA  
66 metabarcoding may provide stronger discriminatory power in detecting environmental variables that influence  
67 community composition compared to traditional methods (Emilson et al., 2017).

68 Then again, amplicon-based HTS analysis for biomonitoring has technical difficulties associated with the  
69 quantitative assessment of the abundance of each species in a community (Elbrecht and Leese, 2015).  
70 Quantification of relative abundance is useful for community characterization, and assessment of biological  
71 indices as most diversity measures depend on a reliable recovery of taxonomic abundances (Gotelli and Chao,

2013; Aylagas et al., 2014; Bucklin et al., 2016). In theory, highly abundant species will yield higher concentrations of template DNA in the community DNA soup (Yu et al., 2012) leading to a positive correlation between the number of HTS reads (depth) and the abundance of species. However, interspecific differences in PCR primer compatibility and body mass may affect the efficiency of PCR amplification, potentially collapsing this correlation (Kowalczyk et al., 2011, Deagle et al., 2009, Zhou et al., 2013). Most metabarcoding studies were based on small organisms, such as algal, bacterial, and planktonic communities, where the morphological quantification of abundance is difficult or impossible, and so abundance and depth cannot be directly compared. However, recent metabarcoding studies have tested and found such positive correlation using relative abundances of morphologically identified taxa. Most of these studies were taxonomically limited to the family Nematoda (Porazinska et al., 2010), Chironomidae (Carew et al., 2013) or calanoid copepods (Clarke et al., 2017) that include similarly-sized species, while a handful tested environmental samples composed of macroinvertebrate taxa with varying size (e.g., Aylagas et al., 2016; Elbrecht et al., 2017; Krehenwinkel et al., 2017; Serrana et al., 2018). However, more tests with wider taxonomic and body size ranges such as macroinvertebrate communities are necessary to verify this relationship for taxonomically diverse communities for use in stream assessment.

In this study, we compared conventional morphological identification against DNA metabarcoding to explore the feasibility and limitations of HTS analysis for stream macroinvertebrate diversity assessment and biomonitoring. Environmental samples of stream macroinvertebrate communities were collected from the Shigenobu River in Shikoku Island, Japan. First, we assessed the relationship between the number of HTS-reads (depth) and relative abundance of taxonomic groups from the metabarcoding and morphology-based data to verify the applicability of abundance-based metrics for subsequent analyses. We then compare alpha and beta diversity metrics calculated from the two data sets and examine how HTS-derived data compares with the traditional method for assessment. Finally, we evaluated the ability of metabarcoding and morphological surveys in assessing the influence of stream environmental conditions in macroinvertebrate community composition in order to assess the capability of metabarcoding data for stream environmental monitoring.

## 2. Materials and Methods

### 2.1. Study area and sample collection

Field survey was conducted in the Shigenobu River basin in Ehime Prefecture, Japan (33°47'N, 132°47'E; Fig. 1) in August 2012. The basin has an area of approximately 445 km<sup>2</sup>, and the river originates from 1,232 m above sea level in its headwaters, flows 36 km along the length of the corridor, and finally discharges into the Seto Inland Sea as a fifth order river. The mountainous area is covered by plantation and secondary forests, while the lowland area predominantly consists of urban and agricultural land. Annual precipitation is approximately 1,300 mm with the wet season occurring in summer. From the mid- to lower reaches of the river, the channel is braided (bankfull width approximately 300 m maximum), and the flow tends to be intermittent owing to a thick channel layer of alluvial deposits. At present, there are three intermittent reaches in the river (upper: 18–22 km from the mouth; middle: 10–16 km; and lower: 4.9–7.4 km) (Kawanishi et al., 2011). Macroinvertebrate samples were collected from 10 sites longitudinally located from the headwater to the lower

110 reaches of the Shigenobu River (elevation range: 4–405 m; Table 1, and Fig. 1). We did not conduct sampling  
111 within the upper and middle intermittent reaches owing to the loss of surface water. Three equally spaced  
112 transects (40-m intervals) were established in each study site, and the macroinvertebrates were sampled at  
113 the center of each transect using a Surber sampler (25 × 25 cm quadrat, 0.5-mm mesh). The samples were  
114 immediately preserved in 99.5% ethanol, which was replaced twice in the field to prevent DNA degradation.  
115 The collected macroinvertebrates were then sorted and morphologically identified to the lowest taxonomic  
116 level possible using the taxonomic keys of Kawai and Tanida (2005).

## 117 *2.2. Library preparation and 454 pyrosequencing*

118 All specimens collected per study site were pooled, and dry weight (DW) was measured using a UMX2 Ultra-  
119 microbalance (Mettler-Toledo, Inc., USA). Based on the measured DW (19 – 403 mg per site), the samples  
120 were separated into ≤10 mg DW portions and placed in 1.5-ml tubes. The samples were then homogenized  
121 in the tubes using pestles. DNA was extracted using DNeasy® Blood and Tissue Kit (Qiagen GmbH, Hilden,  
122 Germany) following the manufacturer's instructions. Extracted DNA quantity and quality were measured using  
123 a NanoDrop 2000 spectrophotometer (Thermo Scientific, Wilmington, DE, USA). DNA originating from the  
124 same study site were mixed with equal amounts of volume. A 658-bp fragment of the Cytochrome Oxidase I  
125 (COI) DNA barcode region was amplified using the universal primers LCO-1490 and HCO-2198 (Folmer et al.,  
126 1994), which both had 454-specific fusion primers (11-mer) and a 4-mer key sequence (TCAG) added to the  
127 5'-end. To pool multiple PCR products from the 10 study sites in one 454 pyrosequence run, a Molecular  
128 Identifier (MID) tag (6-mer) was also added to the 5'-end of the LCO-1490 primer. PCR was conducted with a  
129 40- $\mu$ l reaction volume containing 20  $\mu$ l of Phusion® High-Fidelity PCR Master Mix with hydrofluoric acid (HF)  
130 buffer (New England Biolabs, UK), 2  $\mu$ l of each PCR primer (10  $\mu$ M), 3  $\mu$ l of template DNA, and 13 $\mu$ l of PCR-  
131 grade water using a T100TM Thermal Cycler (Bio-Rad Laboratories, CA, USA). The PCR conditions were  
132 denaturation at 94°C for 2 min; 30 amplification cycles at 94°C for 30 s, 40°C for 30 s, and 72°C for 60 s; and  
133 final extension at 72°C for 10 min. Two (duplicate) PCR products were generated for each site. The resulting  
134 20 PCR products were visualized using gel electrophoresis, and the target bands of successful samples were  
135 sliced and purified using the QIAquick® Gel Extraction Kit (QIAGEN, Germany). The DNA concentration of  
136 each purified PCR product was measured with a Quantus™ Fluorometer (Promega, Wi., USA) using the  
137 QuantiFluor® dsDNA System (Promega, Wi., USA) and was mixed with an equal molar amount.  
138 Pyrosequencing was carried out by Hokkaido System Science Co., Ltd. (Sapporo, Japan) using the 1/16  
139 region of a GS FLX Titanium instrument (454; Roche Diagnostics).

## 140 *2.3. Bioinformatics analysis*

141 In total, 165,508 passing filter reads with an average length of 328-bp were acquired. FastQC v0.11.5  
142 (Andrews 2010) was used to assess sequence quality. The raw pyrosequencing data were initially processed  
143 using Trimmomatic v0.36 (Bolger et al., 2014) to remove non-biological sequences, i.e., primer and index  
144 sequences. Quality filtering of the reads was performed following the UPARSE pipeline (Edgar 2013) using  
145 the maximum expected error parameter. Reads with >1 maximum expected error and length <200-bp were  
146 discarded. Surviving reads for the ten sites were truncated to 200-bp to obtain globally aligned reads, pooled  
147 and clustered into operational taxonomic units (OTU) using USEARCH v9.2.64 (Edgar 2010). For *de novo*

148 OTU assembly, the reads were dereplicated into unique sequences with 100% similarity. Resulting unique  
149 sequences were then clustered into operational taxonomic units (OTUs) with a similarity cut-off value of 97%,  
150 discarding putatively chimeric and singleton sequences. BLAST searches were performed on the OTU  
151 representative sequence against reference databases, i.e., Barcode of Life Database (BOLD) and GenBank.  
152 Taxonomic identification was assigned based on the best BLAST hit to a sequence with  $\geq 97\%$  identity, e-value  
153  $\geq 10^{-5}$  and minimum query coverage  $>90\%$ . Representative OTU sequences without significant BLAST hits  
154 and non-arthropod matches were excluded from subsequent analyses.

155 To examine the correlation between sequence depth and abundance, we plotted the number of reads of given  
156 taxa identified by BLAST against the abundance (individuals per 0.19 m<sup>2</sup>) of the morphologically identified  
157 taxa (morpho-taxa). Metabarcoding identified the samples at the species level while the morpho-taxa were  
158 identified at inconsistent taxonomic levels (e.g., *Hydropsyche orientaris* vs. *Hydropsyche*). The identified  
159 metabarcoding species were collapsed into a coarser taxonomic level (e.g., *Hydropsyche*) or “meta-taxa” to  
160 facilitate a balanced comparison between the two data sets. Detected metabarcoding taxa that did not match  
161 the morpho-taxa or false positive detection was retained at the species level in the dataset.

#### 162 2.4. Biodiversity analysis

163 Diversity was evaluated within-community (alpha diversity) and between the communities (beta diversity) for  
164 both morpho-taxa and metabarcoding-identified species. Quantitative Insights into Microbial Ecology (QIIME)  
165 (Caporaso et al., 2010) was used to estimate diversity, with data matrices rarefied to the sampling site with  
166 the lowest abundance to equalize the number of reads or individuals. Alpha metrics assessed were Chao 1  
167 richness, Fisher's alpha, Simpson's index, and the Shannon-Wiener diversity index. Linear regression  
168 analyses were performed on log-transformed values to test the correlation of each alpha diversity matrices  
169 between the two data sets. Non-phylogenetic beta diversity was estimated using both qualitative metric  
170 (measure changes in communities based on presence or absence/incidence) – Binary-Jaccard dissimilarity,  
171 and quantitative metric (measure differences in relative abundances between communities) – Bray-Curtis  
172 dissimilarity. Mantel test was used to test the correlation between the morpho-taxa, and metabarcoding-  
173 identified species data, and Principal Coordinates Analysis (PCoA) to visualize the dissimilarity matrices.  
174 Procrustes test was used to test for correlation between the two ordinations.

#### 175 2.5. Relationship between environmental variables and macroinvertebrate composition

176 Physical and chemical characteristics were collected from each study sites. Physical habitat characteristics  
177 were measured at three equally placed points along five transects of each study sites. Stream characteristics  
178 such as width were measured on each transect (n = 5), while stream depth was measured to the nearest 1  
179 cm at each point of the transects (n = 15). Current velocity was measured above the streambed at each point  
180 using a portable current meter (Model CR-7WP; Cosmo-Riken Inc., Osaka, Japan). Electric conductivity and  
181 dissolved oxygen were measured using a multiparameter water quality meter (Model 556MPS, YSI Inc. Yellow  
182 Springs, OH, USA). Substrate coarseness and embeddedness were evaluated by visual assessment  
183 (Matthaei et al., 1999; Miyake and Akiyama, 2012). Single surface water samples were collected midstream  
184 of each site for water chemistry analysis. Periphyton biomass was estimated by measuring chlorophyll a  
185 concentration. The quantity of coarse particulate organic matter (CPOM) contained in each sample was



186 estimated via ash-free dry mass (AFDM,  $\text{g m}^{-2}$ ). Total nitrogen (TN) and total phosphorus (TP) were measured  
187 following standard methods (Apha, 2005). Redundancy analysis (RDA) was performed and plotted in the  
188 *vegan* R package (Oksanen et al., 2014) to visualize the relationships between the physical-chemical  
189 characteristics and the macroinvertebrate taxa detected via morphological and metabarcoding identification.  
190 Variance inflation factors (VIF) of the environmental variables were checked using the *vif* function in the  
191 *faraway* R package (Faraway, 2016). Variables selected have VIF values  $<4$  and tolerance  $>0.20$  variables to  
192 avoid issues of multicollinearity. ANOVA was run with 10000 permutations to assess the significance of  
193 constraints. Analyses were performed for the model (global test), for each constrained axis (setting: by = "axis"),  
194 and for each predicting variables (setting: by = "margins") of the two data sets. Morphological and  
195 metabarcoding data were Hellinger-transformed before ordination. The predicting variables were log-  
196 transformed to meet the assumptions of normality and equal variance. Statistical analyses were run in R  
197 v.3.3.1.

### 198 3. Results

#### 199 3.1. Taxonomic identification

200 A total of 8,276 individuals and 45 morpho-taxa (3 families, 6 subfamilies, 31 genera, and 5 species) were  
201 collected from the ten study sites (Table 1). The top three most dominant morpho-taxa were Chironominae  
202 (3,144 individuals, 38%), *Baetis* (2,203 individuals, 26.6%), and Orthocladiinae (1,639 individuals, 19.8%).  
203 The 454 pyrosequencing analysis generated a total of 165,508 reads (range: 8,593 – 31,291 reads/site; mean:  
204 19,942 reads/site) with an average length of 328-bp (range: 31 - 594-bp). Raw sequence data is available  
205 from NCBI Sequence Read Archive (SRA) with an accession number SRR7957429. After quality filtering,  
206 81,836 reads (49.5%) were retained, with 79,902 reads (48.3%) mapped to 156 OTUs. No significant matches  
207 in the BOLD database were obtained. However, 53 OTUs (34%) consisted of 47,641 reads (59.6% of reads  
208 mapped to OTUs) had significant BLAST hits to arthropod sequences in GenBank with  $\geq 97\%$  identity and e-  
209 value  $\geq 10^{-5}$  identified to the species level. The remaining OTUs either have BLAST identity under the matching  
210 criteria (91 OTUs, 31,962 reads), non-arthropod sequence match (7 OTUs, 171 reads), or no match (5 OTUs,  
211 128 reads). Metabarcoding identified 44 species (4 matches with "sp.") under 6 orders, 13 families, and 29  
212 genera. For the orders, Diptera was the most abundant with 30,955 reads (65% of the taxonomically-identified  
213 arthropod sequences), followed by Ephemeroptera and Trichoptera with 14,881 reads (31.2%) and 1,570  
214 reads (3.3%) respectively. Other orders, i.e., Plecoptera, Odonata, and Podocoptida, had  $<1\%$  read abundance.  
215 See Fig. S2 for the relative abundance of the metabarcoding-detected species, and the meta- and morpho-  
216 taxa.

217 Significant positive correlations were found between the total abundance of morpho-taxa and the read  
218 abundance of meta-taxa for all sites, both in analyses including ( $R^2 = 0.18$ ;  $p = 0.001$ ) and excluding ( $R^2 =$   
219  $0.48$ ;  $p = 0.02$ ) false positive and false negative detections (Fig. 2). Positive linear correlations ( $p < 0.05$ ) were  
220 also found for each sampling site including false positive and false negative detections, except for four sites  
221 i.e. sites 3, 4, 5 and 7 (Table 1). Thirty-five species (95.5% of reads) from our metabarcoding data matches or  
222 were under the taxonomic identification of 11 morpho-taxa (92.9% of individuals). The remaining 9 species  
223 (4.5% of reads) were false positive detections, while 34 morpho-taxa (7.12% of individuals) were undetected.

224 Most of the undetected morpho-taxa (false negative) have low representation (<6 individuals) in the community  
225 sample, with only nine groups having >14 individuals (Table 2).

### 226 *3.2. Comparison between morphological and metabarcoding-based diversity metrics*

227 Taxonomic richness or alpha diversity was assessed for both the morpho-taxa and metabarcoding-identified  
228 species data sets. Metabarcoding species data showed relatively higher values for Chao 1 richness and  
229 Fisher's alpha, except for site 10, and sites 4 and 10, respectively. Additionally, Simpson's and Shannon-  
230 Wiener indices have relatively higher values for some sites in comparison to the morpho-taxa dataset (Table  
231 S1). However, linear regression analysis revealed that the alpha diversity metrics of the two data sets were  
232 not significantly correlated i.e., Chao 1 ( $p$ -value = 0.458), Fisher's alpha ( $p$ -value = 0.698), Simpson's index  
233 ( $p$ -value = 0.506) and Shannon-Wiener index ( $p$ -value = 0.653). On the contrary, mantel testing both beta  
234 diversity distances, Binary-Jaccard (Mantel  $r$  = 0.4701, 9999 permutations,  $p$  = 0.0073) and Bray-Curtis  
235 (Mantel  $r$  = 0.4581, 9999 permutations,  $p$  = 0.0075) dissimilarities of the morpho-taxa and metabarcoding-  
236 identified species data matrices showed significant correlation. PCoA ordination plots of the beta diversity  
237 estimates were also significantly correlated shown via Procrustes analysis (Fig. 3).

### 238 *3.3. Environmental variables and macroinvertebrate community composition*

239 The detailed physical-chemical characteristics collected across the ten study sites are presented in Table S1.  
240 Redundancy analysis (RDA) was performed to visualize the relationships between stream physical-chemical  
241 characteristics and macroinvertebrate community composition. Seven environmental variables were selected  
242 as predicting variables, i.e., chlorophyll *a*, conductivity, CPOM, discharge, dissolved oxygen, TN, and TP.  
243 Global models of the morphology ( $p$  = 0.035) and metabarcoding ( $p$  < 0.001) data set constrained by the  
244 environmental variables were found to be statistically significant following a permutation ANOVA test. RDA  
245 explained about 91% of the total variability between macroinvertebrate composition and the environmental  
246 variables for the morphology data. Of the 91%, 59% was explained by RDA1 and 15% by RDA2. However,  
247 only the first axis was statistically significant (RDA1:  $p$  = 0.033). For the metabarcoding-identified species data,  
248 RDA explained 93% of the total variability. From this, the first two statistically significant axes explained 44%  
249 and 19 % respectively (RDA1:  $p$  < 0.001; RDA2:  $p$  = 0.011). The first axes (RDA1) of both data sets were  
250 positively loaded with chlorophyll *a*, conductivity, TN, and TP (biplot scores = 0.5171, 0.5559, 0.8195, and  
251 0.7151 respectively), and negatively loaded with CPOM, dissolved oxygen, and discharge (biplot scores = -  
252 0.5367, -0.7587, and -0.1013 respectively). For second axis (RDA2) of the metabarcoding data was positively  
253 loaded with CPOM, discharge, and TN (biplot scores = 0.0140, 0.2053, and 0.0651 respectively), and  
254 negatively loaded with chlorophyll *a*, dissolved oxygen, conductivity and TP (biplot scores = -0.3012, -0.6468,  
255 -0.2314 and -0.1642 respectively) (Fig. 4). Also, permutation ANOVA set by margin to assess the marginal  
256 effects of each marginal term analyzed in the model with all other variables showed all environmental  
257 characteristics, except for chlorophyll *a*, were statistically significant for the metabarcoding data (Table S3).

## 258 **4. Discussion**

259 Assessing the changes in community composition in response to environmental variability is a key aspect of  
260 biodiversity assessment and monitoring (Ives and Carpenter, 2007). We evaluated the ability of the

261 morphological and metabarcoding approaches to assess the relationship between physical-chemical  
262 characteristics and macroinvertebrate community composition. Community-environment relationships can be  
263 quantified by explained variance from a redundancy analysis (Lu et al., 2016). Both models were significant,  
264 but the metabarcoding data set explained a relatively higher percentage of variation between the  
265 environmental variables and community composition. Although both approaches presented almost similar  
266 responses for each predictor variables (except for CPOM, discharge, and TN), only metabarcoding data  
267 ordination explained statistically significant variability between the environmental variables and community  
268 composition for the first two axes, and for each marginal terms. Hence, we can interpret that statistically  
269 significant physical-chemical characteristic from these analyses, i.e., conductivity, CPOM, discharge,  
270 dissolved oxygen, TN and TP strongly influenced macroinvertebrate community composition along the  
271 Shigenobu River basin during the conduct of the study.

272 Evaluation of the sufficient taxonomic level for biodiversity assessments are vital for the establishment of a  
273 cost-effective monitoring program since identification at a higher taxonomic level (e.g. family or phylum) will  
274 reduce cost and processing time, requiring lesser taxonomic expertise (Thompson et al., 2003). Choosing the  
275 most appropriate taxonomic resolution highly depends on the biological group, the environment of the site and  
276 the objectives of the study (Machado et al., 2015). However, taxonomic identification with coarser resolution  
277 groups together biological species with different environmental preferences, masking the relationship between  
278 taxonomic composition and environmental variables (Martin et al., 2016). Nonetheless, DNA metabarcoding  
279 can provide a much more accurate taxonomic identification with finer resolution, so preliminary assessment  
280 of the sufficient taxonomic resolution appropriate for a specific study would not be required.

281 We observed no significant correlation between the alpha diversity measures of morphological and  
282 metabarcoding data sets. The lack of correlation could be due to the difference in taxonomic resolution, with  
283 the latter having relatively higher taxonomic richness per site. Previous studies using metabarcoding have  
284 reported a generally higher species richness compared to morphology-based surveys (Coward et al., 2015).  
285 DNA metabarcoding uncovered specific taxonomic groups undetected (false positive) from morphological  
286 assessments which magnifies the variation in community composition (Emilson et al., 2017). Molecular-based  
287 surveys have been proven to provide a broader view of the taxa present in the community due to its ability to  
288 uncover small sized, even eggs and juveniles of larger individuals from the collected environmental sample  
289 (Coward et al., 2015). This, in addition to the undetected (false negative) morpho-taxa most likely resulted in  
290 the lack of correlation between the alpha diversity values of our morphological and metabarcoding-based  
291 approaches. On the contrary, significant correlations were observed for both beta diversity estimates assessed  
292 based on presence-absence (incidence) and sample/read abundance. Suggesting that changes in community  
293 composition observed from the metabarcoding data were congruent with the morphology-based assessment  
294 leading to similar interpretation about the ecological state of the sampled river. Our results were congruent  
295 with the report of Gibson et al. (2015) that HTS analysis provides a complete site- region-level biodiversity  
296 estimation (i.e., alpha, beta and gamma diversity metrics). These support previous studies that proclaimed  
297 HTS-based analysis is a suitable method for freshwater macroinvertebrate diversity assessments as an  
298 alternative to morphology-based surveys (Hajibabaei et al., 2011; Carew et al., 2018; Serrana et al., 2018).



299 Whereas many previous amplicon-based HTS studies have focused on microbial or planktonic taxa (e.g.,  
300 Kermarrec et al., 2013, González-Tortuero et al., 2015, Hajibabaei et al., 2012, Tang et al., 2012, Zimmermann  
301 et al., 2015), we assessed environmental samples of diverse size with representatives having relatively large  
302 body size (>0.6 mm) which allowed us to directly compare the HTS data from conventional morphological  
303 identification. The positive correlation between the abundance of morphological taxa and sequence read  
304 abundance of the metabarcoding taxa among the merged taxonomic groups suggests that metabarcoding  
305 could be used to quantify relative species abundance based on depth information. It is worth to note that in  
306 accordance to the recent report of Elbrecht et al. (2017), we observed this correlation with a taxonomically  
307 broader community (i.e. the entire stream macroinvertebrate community) in comparison to former studies that  
308 also reported a positive correlation of sample and read abundance such as Nematoda (Porazinska et al.,  
309 Chironomidae (Carew et al., 2013), and calanoid copepod (Clarke et al., 2017) communities that  
310 assessed similarly-sized species. Although we did not measure the biomass (dry mass or wet mass) of  
311 individual samples, we can assume that there was large body mass variation between the small, e.g.,  
312 Chironomidae: reported mean individual dry mass = 0.06 mg (Watanabe et al., 2008) and large e.g.  
313 *Stenopsyche marmorata*: 14.26 mg (Nakagawa and Takemon, 2015) taxa in our samples.

314 Large taxa are expected to yield a larger portion of template DNA in the community DNA soup, leading to a  
315 higher number of reads regardless of their abundances. However, the fact that we were still able to detect an  
316 abundance-depth correlation demonstrates the robustness of this relationship. It is possible that the presumed  
317 high yield of template DNA from abundant species may overcome the potential bias effect of body mass  
318 variation among taxa. However, a comparison of the correlations between both body mass and abundance  
319 with depth is required in the future to validate these findings, considering the potential influence of taxon  
320 biomass to sequence reads (Elbrecht, Peinert, and Leese, 2017). This positive abundance-depth correlation  
321 also indicates that HTS may have low statistical power for detecting scarce species in community samples,  
322 which may lead to a high false-negative rate of species detection. Among the 45 morpho-taxa, 34 (7.12% of  
323 the individuals) were false negative, and 25 of these had relatively low representation in the whole community  
324 (<6 out of 8,276 individuals). All false negative detections have COI or whole genome sequences in GenBank.  
325 It is assumed that these scarce taxonomic groups yielded insufficient amounts of template DNA for PCR  
326 amplification and thus failed in the following HTS-based detection. Another likely reason for these false-  
327 negative detections is low PCR primer compatibility (Kowalczyk et al., 2011, Deagle et al., 2009, Zhou et al.,  
328 2013): species that have binding sites with a low affinity to the primers may capture fewer primer molecules  
329 during PCR annealing.

330 Our metabarcoding approach was able to identify 11 of the morpho-taxa (92.9% of the individuals) in the  
331 community samples. However, false negative morpho-taxa (24.4% or 11/45 detected morpho-taxa) was  
332 considerably higher than has been reported in previous studies directly comparing morphological and  
333 metabarcoding identification, e.g., 0–25.0% or 0/8–2/8 species in Blanckenhorn et al. (2016); between 78-  
334 83% species detection in Lobo et al. (2017); 80% or 16/20 of the morphologically identified families in Serrana  
335 et al. (2018); and 85% of samples identified at the family level in Carew et al. (2018). Our high missing rate  
336 could be due to: 1) we did not control (normalize) the relative abundance of taxa before the HTS library  
337 preparation; 2) we used 454 pyrosequencing, which generates smaller numbers of reads than more recent  
338 HTS platforms such as Illumina sequencer (Luo et al., 2012); or 3) our macroinvertebrate community sample

339 contained large inter-taxonomic variations in abundance and body mass. If we normalized the relative  
340 abundances before HTS library preparation by reducing the sample size of abundant morphological taxa (e.g.,  
341 Harris et al., 2010), we would expect to obtain a higher detection rate of scarce species. However, the  
342 additional processing time required for this might reduce the motivation for using HTS (i.e., time-saving), and  
343 this approach also cannot estimate the relative abundances of taxa. It is possible that the recent and rapid  
344 advancement of HTS may lead to deeper sequencing technology with a larger read capacity may reduce the  
345 missing rate. HTS technology, e.g., 454 sequencing, Illumina or SOLiD has higher error frequency than Sanger  
346 sequencing with an approximately 0.5% vs. 0.1% error per nucleotide site, respectively (Shendure 2008). The  
347 454 system tends to cause errors of frame shift and gap opening in samples with low GC contents  
348 (Blanckenhorn et al., 2016), which may cause a biased over inflation of the diversity estimates (e.g., Brown et  
349 al., 2014, Rosen et al., 2012).

## 350 **5. Conclusion**

351 Reliable and comprehensive, but cost and time efficient methods are of critical importance for biodiversity  
352 assessment and environmental monitoring of freshwater ecosystems. In this study, we assess the feasibility  
353 of HTS-driven assessments of species diversity and relative abundances. We found supporting evidence for  
354 the positive correlation between HTS depth and abundance in the macroinvertebrate community, which had  
355 a wider taxonomical range and body mass variation. This finding indicates a possible application of  
356 metabarcoding in the quantitative assessment of relative abundances in taxonomically broad communities,  
357 although further validations are necessary that use body mass (dry mass) rather than abundance. This  
358 correlation also highlighted the pros and cons of the quantitative nature of amplicon-based HTS data. Based  
359 on our direct comparison of morphological and metabarcoding analyses, a high rate of false-negative detection  
360 was found specifically from scarce species in the community sample. Higher alpha diversity was observed  
361 due to the finer taxonomic resolution provided by metabarcoding, and that both incidence and abundance-  
362 based estimation of beta diversity reflects that of the morphologically-identified data set. Assessment of the  
363 relationship between stream physical-chemical characteristics and the macroinvertebrate taxa detected via  
364 morphological and metabarcoding identification showed that both models were significant, but the latter  
365 explained a higher percentage of variation which indicates that the metabarcoding approach is capable, and  
366 a bit more sensitive in detecting environmental patterns comparable to morphology-based data sets mainly  
367 due to its ability to assign finer taxonomic identification (i.e., species level). Technological advancements in  
368 both the quantity (i.e., large capacity of total reads) and quality (i.e., low error rate) of HTS would make HTS-  
369 based biomonitoring more accurate and reliable for both the research community and the public.

## 370 **Acknowledgments**

371 The authors thank Noriyuki Egawa and Yusuke Minakami for their assistance on the fieldwork and laboratory  
372 analysis. This research was supported by the Japan Society for the Promotion of Science (JSPS) (grant  
373 numbers: 16H04437, 17H01666, 17F17908). M. Gamboa was supported by JSPS Postdoctoral Fellowships  
374 for Research in Japan.

## 375 References

- 376 Andrews S. 2010. FastQC: a quality control tool for high throughput sequence data. Available from:  
377 <http://www.bioinformatics.babraham.ac.uk/projects/fastqc>.
- 378 Apha, A., 2005. WEF, 2005. Standard methods for the examination of water and wastewater, 21, pp.258-259.
- 379 Aylagas, E., Borja, Á. and Rodríguez-Ezpeleta, N., 2014. Environmental status assessment using DNA  
380 metabarcoding: towards a genetics based marine biotic index (gAMBI). PLoS One, 9(3), p.e90529.
- 381 Aylagas, E., Borja, Á., Irigoien, X. and Rodríguez-Ezpeleta, N., 2016. Benchmarking DNA metabarcoding for  
382 biodiversity-based monitoring and assessment. Frontiers in Marine Science, 3, p.96.
- 383 Baird, D.J. and Hajibabaei, M., 2012. Biomonitoring 2.0: a new paradigm in ecosystem assessment made  
384 possible by next - generation DNA sequencing. Molecular ecology, 21(8), pp.2039-2044.
- 385 Barnes, M.A., and Turner, C.R., 2016. The ecology of environmental DNA and implications for conservation  
386 genetics. Conservation Genetics, 17(1), pp.1-17.
- 387 Beng, K.C., Tomlinson, K.W., Shen, X.H., Surget-Groba, Y., Hughes, A.C., Corlett, R.T. and Slik, J.F., 2016.  
388 The utility of DNA metabarcoding for studying the response of arthropod diversity and composition to land-  
389 use change in the tropics. Scientific Reports, 6, p.24965.
- 390 Benson, D.A., Cavanaugh, M., Clark, K., Karsch-Mizrachi, I., Lipman, D.J., Ostell, J. and Sayers, E.W., 2012.  
391 GenBank. Nucleic acids research, 41(D1), pp. D36-D42.
- 392 Blanckenhorn W. U., P. T. Rohner, M. V. Bernasconi, J. Haugstetter, and A. Buser. 2016. Is qualitative and  
393 quantitative metabarcoding of dung fauna biodiversity feasible? Environmental Toxicology and Chemistry.  
394 35:1970-1977.
- 395 Bucklin, A., Lindeque, P.K., Rodriguez-Ezpeleta, N., Albaina, A. and Lehtiniemi, M., 2016. Metabarcoding of  
396 marine zooplankton: prospects, progress, and pitfalls. Journal of Plankton Research, 38(3), pp.393-400.
- 397 Carew, M.E., V.J. Pettigrove, L. Metzeling, and A.A. Hoffmann., 2013. Environmental monitoring using next  
398 generation sequencing: rapid identification of macroinvertebrate bioindicator species. Frontiers in Zoology,  
399 10: 45.
- 400 Carew, M.E., Kellar, C.R., Pettigrove, V.J. and Hoffmann, A.A., 2018. Can high-throughput sequencing detect  
401 macroinvertebrate diversity for routine monitoring of an urban river? Ecological indicators, 85, pp.440-450.
- 402 Caporaso, J.G., Kuczynski, J., Stombaugh, J., Bittinger, K., Bushman, F.D., Costello, E.K., Fierer, N., Pena,  
403 A.G., Goodrich, J.K., Gordon, J.I. and Huttley, G.A., 2010. QIIME allows analysis of high-throughput  
404 community sequencing data. Nature methods, 7(5), p.335.
- 405 Carrizo, S.F., Jähnig, S.C., Bremerich, V., Freyhof, J., Harrison, I., He, F., Langhans, S.D., Tockner, K., Zarfl,  
406 C. and Darwall, W., 2017. Freshwater megafauna: Flagships for freshwater biodiversity under threat.  
407 Bioscience, 67(10), pp.919-927.
- 408 Clarke, L. J., J. M.Beard, K. M. Swadling, and B. E. Deagle. 2017. Effect of marker choice and thermal cycling  
409 protocol on zooplankton DNA metabarcoding studies. Ecology and Evolution, 7: 873–883.
- 410 Cowart, D.A., Pinheiro, M., Mouchel, O., Maguer, M., Grall, J., Miné, J. and Arnaud-Haond, S., 2015.  
411 Metabarcoding is powerful yet still blind: a comparative analysis of morphological and molecular surveys  
412 of seagrass communities. PLoS One, 10(2), p.e0117562.

- 413 Deagle B. E., R. Kirkwood, and S. N. Jarman. 2009. Analysis of Australian fur seal diet by pyrosequencing  
414 prey DNA in faeces. *Molecular Ecology*. 18:2022-2038.
- 415 Dowle, E. J., X. Pochon, J. C. Banks, K. Shearer, S. A. Wood. 2016. Targeted gene enrichment and high-  
416 throughput sequencing for environmental biomonitoring: a case study using freshwater  
417 macroinvertebrates, *Molecular Ecology Resources*, 16: 1240-1254.
- 418 Edgar R. C. 2010. Search and clustering orders of magnitude faster than BLAST. *Bioinformatics*. 26:2460-  
419 2461.
- 420 Edgar, R. C. 2013. UPARSE: highly accurate OTU sequences from microbial amplicon reads. *Nature methods*,  
421 10(10), 996.
- 422 Elbrecht, V. and F. Leese. 2015. Can DNA-based ecosystem assessments quantify species abundance?  
423 Testing primer bias and biomass – sequence relationships with an innovative metabarcoding protocol.  
424 *PLoS ONE*, 10: e0130324.
- 425 Elbrecht, V., Peinert, B., and Leese, F. 2017. Sorting things out: assessing effects of unequal specimen  
426 biomass on DNA metabarcoding. *Ecology and evolution*, 7(17), 6918-6926.
- 427 Elbrecht, V., Vamos, E.E., Meissner, K., Aroviita, J. and Leese, F., 2017. Assessing strengths and weaknesses  
428 of DNA metabarcoding - based macroinvertebrate identification for routine stream monitoring. *Methods in*  
429 *Ecology and Evolution*, 8(10), pp.1265-1275.
- 430 Emilson, C.E., Thompson, D.G., Venier, L.A., Porter, T.M., Swystun, T., Chartrand, D., Capell, S. and  
431 Hajibabaei, M., 2017. DNA metabarcoding and morphological macroinvertebrate metrics reveal the same  
432 changes in boreal watersheds across an environmental variable. *Scientific reports*, 7(1), p.12777.
- 433 Faraway, J.J., 2016. *Extending the linear model with R: generalized linear, mixed effects and nonparametric*  
434 *regression models* (Vol. 124). CRC press.
- 435 Folmer O., M. Black, W. Hoeh, R. Lutz, and R. Vrijenhoek. 1994. DNA primers for amplification of mitochondrial  
436 cytochrome c oxidase subunit I from diverse metazoan invertebrates. *Molecular Marine Biology and*  
437 *Biotechnology*. 3:294-297.
- 438 Gibson, J.F., Shokralla, S., Curry, C., Baird, D.J., Monk, W.A., King, I. and Hajibabaei, M., 2015. Large-scale  
439 biomonitoring of remote and threatened ecosystems via high-throughput sequencing. *PloS one*, 10(10),  
440 p.e0138432.
- 441 González-Tortuero E., J. Rusek, A. Petrussek, S. Gießler, D. Lyras, S. Grath, F. Castro-Monzón, and J.  
442 Wolinska. 2015. The quantification of representative sequences pipeline for amplicon sequencing: case  
443 study on within-population its1 sequence variation in a microparasite infecting daphnia. *Molecular Ecology*  
444 *Resources*. 15:1385-1395.
- 445 Gotelli, N.J. and Chao, A., 2013. Measuring and estimating species richness, species diversity, and biotic  
446 similarity from sampling data.
- 447 Hajibabaei M., S. Shokralla, X. Zhou, G. A. C. Singer, and DJ Baird. 2011. Environmental barcoding: A next-  
448 generation sequencing approach for biomonitoring applications using river benthos. *PLoS ONE*. 6:e17497.
- 449 Hajibabaei M., J. L. Spall, S. Shokralla, and S. van Konynenburg. 2012. Assessing biodiversity of a freshwater  
450 benthic macroinvertebrate community through non-destructive environmental barcoding of DNA from  
451 preservative ethanol. *BMC Ecology*. 12:28.

- 452 Harris J. K., J. W. Sahl, T. A. Castoe, B. D. Wagner, D. D. Pollock, and J. R. Spear. 2010. Comparison of  
453 normalization methods for construction of large, multiplex amplicon pools for next-generation sequencing.  
454 *Applied and Environmental Microbiology*. 76:3863-3868
- 455 Hebert P. D. N., A. Cywinska, S. L. Ball, and J. R. DeWaard. 2003. Biological identifications through DNA  
456 barcodes. *Proceedings of the Royal Society of London. Series B, Biological sciences*. 270:313-321.
- 457 Heino, J., 2014. Taxonomic surrogacy, numerical resolution and responses of stream macroinvertebrate  
458 communities to ecological variables: are the inferences transferable among regions? *Ecological Indicators*,  
459 36, 186-194.
- 460 Ives, A.R. and Carpenter, S.R., 2007. Stability and diversity of ecosystems. *science*, 317(5834), pp.58-62.
- 461 Jackson, J. K., Battle, J. M., White, B. P., Pilgrim, E. M., Stein, E. D., Miller, P. E., and Sweeney, B. W., 2014.  
462 Cryptic biodiversity in streams: a comparison of macroinvertebrate communities based on morphological  
463 and DNA barcode identifications. *Freshwater Science*, 33(1), 312-324.
- 464 Kawai T., and K. Tanida. 2005. *Aquatic insects of Japan: manuals with keys and illustration (in Japanese)*.  
465 Tokai University Press, Kanagawa, Japan (in Japanese).
- 466 Kawanishi R., M. Inoue, M. Takagi, Y. Miyake, and T. Shimizu. 2011. Habitat factors affecting the distribution  
467 and abundance of spinous loach, *Cobitis shikokuensis*, in southwestern Japan. *Ichthyological Research*.  
468 58:202-208.
- 469 Kermarrec L., A. Franc, F. Rimet, P. Chaumeil, J. F. Humbert, and A. Bouchez. 2013. Next-generation  
470 sequencing to inventory taxonomic diversity in eukaryotic communities: A test for freshwater diatoms.  
471 *Molecular Ecology Resources*. 13:607-619.
- 472 Kowalczyk R., P. Taberlet, E. Coissac, A. Valentini, C. Miquel, T. Kamiński, and J. M. Wójcik. 2011. Influence  
473 of management practices on large herbivore diet-case of European bison in Białowieza Primeval Forest  
474 (Poland). *Forest Ecology and Management*. 261:821-828.
- 475 Krehenwinkel, H., Wolf, M., Lim, J.Y., Rominger, A.J., Simison, W.B. and Gillespie, R.G., 2017. Estimating and  
476 mitigating amplification bias in qualitative and quantitative arthropod metabarcoding. *Scientific reports*,  
477 7(1), p.17668.
- 478 Lobo, J., Shokralla, S., Costa, M.H., Hajibabaei, M. and Costa, F.O., 2017. DNA metabarcoding for high-  
479 throughput monitoring of estuarine macrobenthic communities. *Scientific reports*, 7(1), p.15618.
- 480 Lu, H.P., Yeh, Y.C., Sastri, A.R., Shiah, F.K., Gong, G.C. and Hsieh, C.H., 2016. Evaluating community-  
481 environment relationships along fine to broad taxonomic resolutions reveals evolutionary forces underlying  
482 community assembly. *The ISME journal*, 10(12), p.2867.
- 483 Luo C., D. Tsementzi, N. Kyrpides, T. Read, and K. T. Konstantinidis. 2012. Direct comparisons of Illumina vs.  
484 Roche 454 sequencing technologies on the same microbial community DNA sample. *PLoS ONE*.  
485 7:e30087.
- 486 Machado, K.B., Borges, P.P., Carneiro, F.M., de Santana, J.F., Vieira, L.C.G., de Moraes Huszar, V.L. and  
487 Nabout, J.C., 2015. Using lower taxonomic resolution and ecological approaches as a surrogate for  
488 plankton species. *Hydrobiologia*, 743(1), pp.255-267.
- 489 Macher, J.N., Salis, R.K., Blakemore, K.S., Tollrian, R., Matthaei, C.D. and Leese, F., 2016. Multiple-stressor  
490 effects on stream invertebrates: DNA barcoding reveals contrasting responses of cryptic mayfly species.



- 491 Ecological Indicators, 61, pp.159-169.
- 492 Martin, G.K., Adamowicz, S.J. and Cottenie, K., 2016. Taxonomic resolution based on DNA barcoding affects  
493 environmental signal in metacommunity structure. *Freshwater Science*, 35(2), pp.701-711.
- 494 Matthaei, C.D., Peacock, K.A. and Townsend, C.R., 1999. Patchy surface stone movement during disturbance  
495 in a New Zealand stream and its potential significance for the fauna. *Limnology and Oceanography*, 44(4),  
496 pp.1091-1102.
- 497 Menezes, S., Baird, D.J. and Soares, A.M., 2010. Beyond taxonomy: a review of macroinvertebrate trait -  
498 based community descriptors as tools for freshwater biomonitoring. *Journal of Applied Ecology*, 47(4),  
499 pp.711-719.
- 500 Miyake, Y. and Akiyama, T., 2012. Impacts of water storage dams on substrate characteristics and stream  
501 invertebrate assemblages. *Journal of Hydro-Environment Research*, 6(2), pp.137-144.
- 502 Nakagawa H., and Y. Takemon. 2015. Length-mass relationships of macro-invertebrates in a freshwater  
503 stream in Japan. *Aquat Insects*. 36:53-61.
- 504 Porazinska D. L., W. Sung, R. M. Giblin-Davis, and W. K. Thomas. 2010. Reproducibility of read numbers in  
505 high-throughput sequencing analysis of nematode community composition and structure. *Molecular  
506 Ecology Resources*. 10:666-676.
- 507 Ratnasingham S., and P. D. N. Hebert. 2007. BOLD: The Barcode of Life Data System: Barcoding. *Molecular  
508 Ecology Notes*. 7:355-364.
- 509 Rosen M. J., B. J. Callahan, D. S. Fisher, and S. P. Holmes. 2012. Denoising PCR-amplified metagenome  
510 data. *BMC Bioinformatics*. 13: 83.
- 511 Serrana, J.M., Yaegashi, S., Kondoh, S., Li, B., Robinson, C.T. and Watanabe, K., 2018. Ecological influence  
512 of sediment bypass tunnels on macroinvertebrates in dam-fragmented rivers by DNA metabarcoding.  
513 *Scientific reports*, 8(1), p.10185.
- 514 Shearer, K. A., Hayes, J. W., Jowett, I. G., and Olsen, D. A. (2015). Habitat suitability curves for benthic  
515 macroinvertebrates from a small New Zealand river. *New Zealand journal of marine and freshwater  
516 research*, 49(2), 178-191.
- 517 Shendure J., and H. Ji. 2008. Next-generation DNA sequencing. *Nature Biotechnology*. 26: 1135-1145.
- 518 Soininen, E.M., Gauthier, G., Bilodeau, F., Berteaux, D., Gielly, L., Taberlet, P., Gussarova, G., Bellemain, E.,  
519 Hassel, K., Stenøien, H.K. and Epp, L., 2015. Highly overlapping winter diet in two sympatric lemming  
520 species revealed by DNA metabarcoding. *Plos One*, 10(1), p.e0115335.
- 521 Sweeney, B.W., Battle, J.M., Jackson, J.K. and Dapkey, T., 2011. Can DNA barcodes of stream  
522 macroinvertebrates improve descriptions of community structure and water quality? *Journal of the North  
523 American Benthological Society*, 30(1), pp.195-216.
- 524 Tang C. Q., F. Leasi, U. Obertegger, A. Kieneke, T. G. Barraclough, and D. Fontaneto. 2012. The widely used  
525 small subunit 18S rDNA molecule greatly underestimates true diversity in biodiversity surveys of the  
526 meiofauna. *Proceedings of the National Academy of Sciences*. 109:16208-16212.
- 527 Thompson, B.W., Riddle, M.J. and Stark, J.S., 2003. Cost-efficient methods for marine pollution monitoring at  
528 Casey Station, East Antarctica: the choice of sieve mesh-size and taxonomic resolution. *Marine Pollution  
529 Bulletin*, 46(2), pp.232-243.

- 530 Thudi M., Y. Li, S. A. Jackson, G. D. May, and R. K. Varshney. 2012. Current state-of-art of sequencing  
531 technologies for plant genomics research. *Briefings in Functional Genomics*. 11:3-11.
- 532 Voelkerding K. V., S. A. Dames, and J. D. Durtschi. 2009. Next-generation sequencing: from basic research  
533 to diagnostics. *Clinical Chemistry*. 55:641-658.
- 534 Watanabe K., M. T. Monaghan, Y. Takemon, and T. Omura. 2008. Biodilution of heavy metals in a stream  
535 macroinvertebrate food web: evidence from stable isotope analysis. *Science of the Total Environment*.  
536 394:57-67.
- 537 Yu D. W., Y. Ji, B. C. Emerson, X. Wang, C. Ye, C. Yang, and Z. Ding. 2012. Biodiversity soup: metabarcoding  
538 of arthropods for rapid biodiversity assessment and biomonitoring. *Methods in Ecology and Evolution*.  
539 3:613-623.
- 540 Zhou X., Y. Li, S. Liu, Q. Yang, X. Su, L. Zhou, M. Tang, R. Fu, J. Li, and Q. Huang. 2013. Ultra-deep  
541 sequencing enables high-fidelity recovery of biodiversity for bulk arthropod samples without PCR  
542 amplification. *GigaScience*. 2:4.
- 543 Zimmermann, J., Glöckner, G., Jahn, R., Enke, N. and Gemeinholzer, B., 2015. Metabarcoding vs.  
544 morphological identification to assess diatom diversity in environmental studies. *Molecular Ecology*  
545 *Resources*, 15(3), pp.526-542.

#### 546 **Author Contributions**

547 J. Serrana analyzed and interpreted the data, and wrote the manuscript. Y. Miyake conducted field survey,  
548 sample collection, and morphological identification. M. Gamboa conducted molecular laboratory work. K.  
549 Watanabe designed the whole study, and interpreted the data. All authors did critical revision and approved  
550 the final version of the manuscript.

#### 551 **Competing Interests**

552 The authors declare no competing interests or other interests that might be perceived to influence the results  
553 and/or discussion reported in this paper.

554 **Figures**

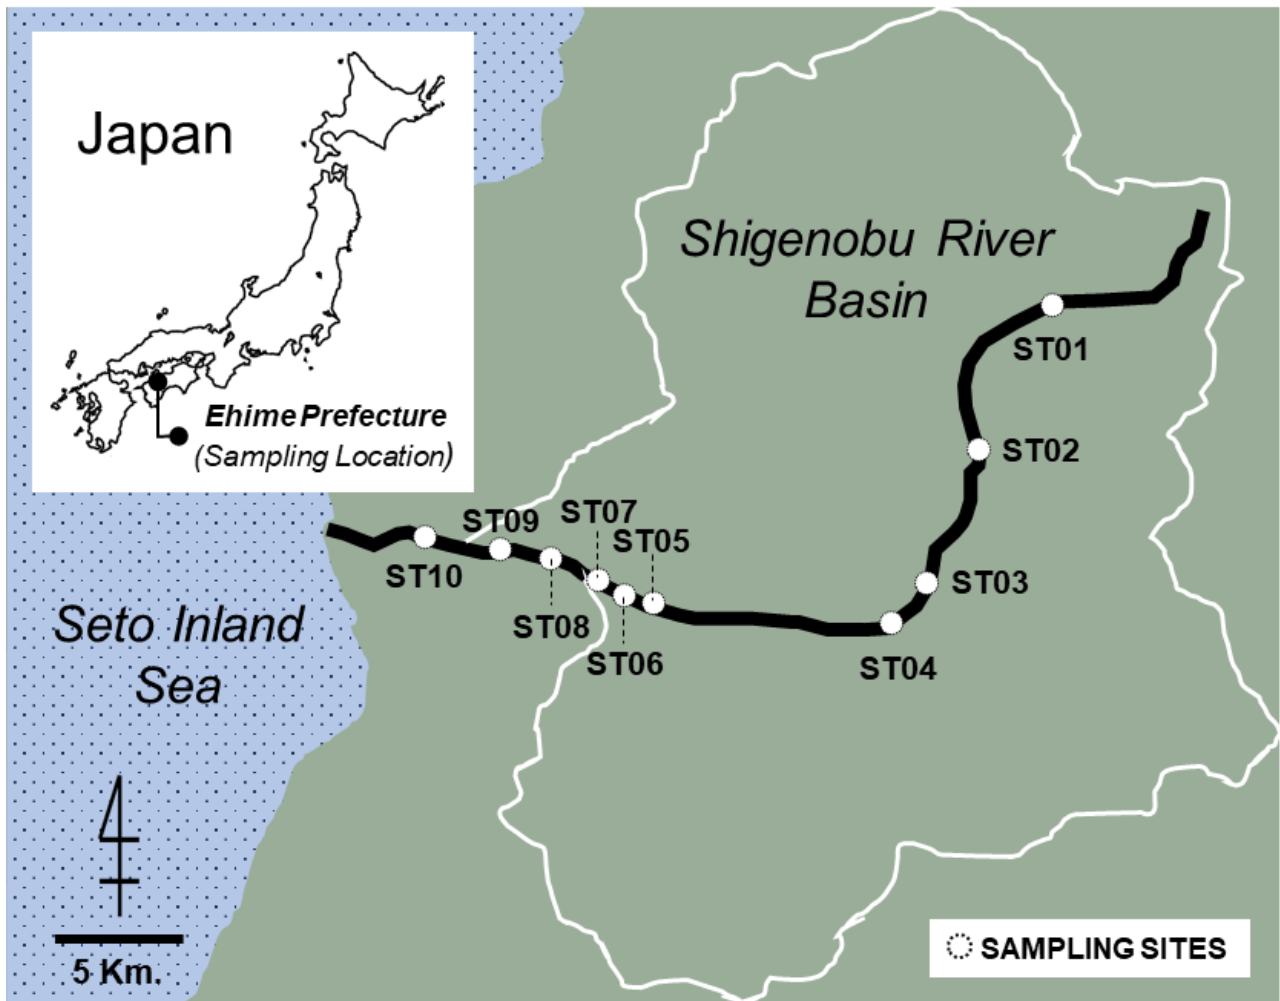

555  
556 Figure 1. Map of the ten study sites along the Shigenobu River in Shikoku Island, Japan. The altitude of each site is provided in Table 1.

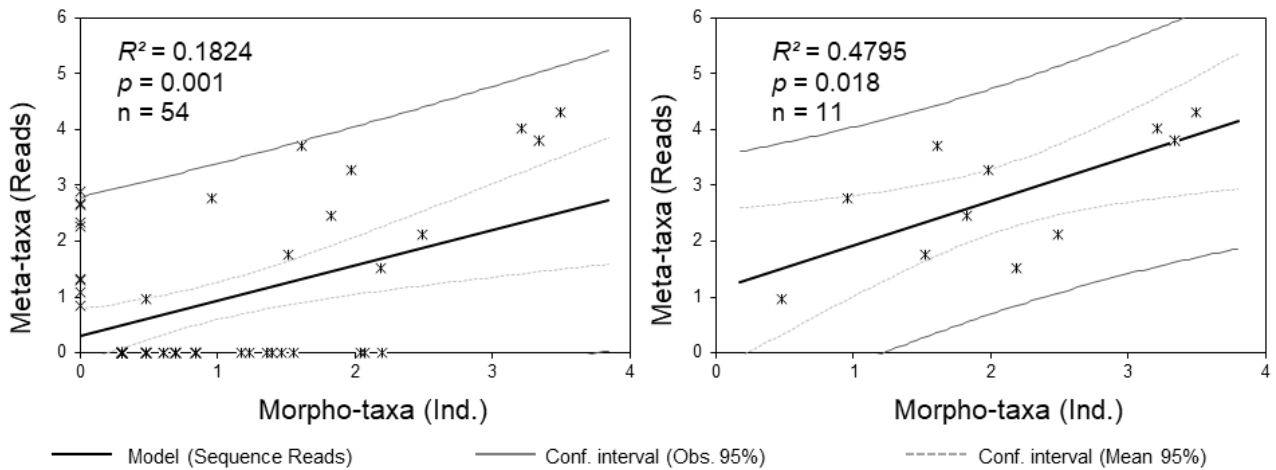

557  
558 Figure 2. Correlation between the log sample abundance (morphologically-identified taxa/morpho-taxa) and log 454-read abundance  
559 (metabarcoding-identified taxa) of all sites showing analysis including (left) and excluding (right) false positive and false negative detection.

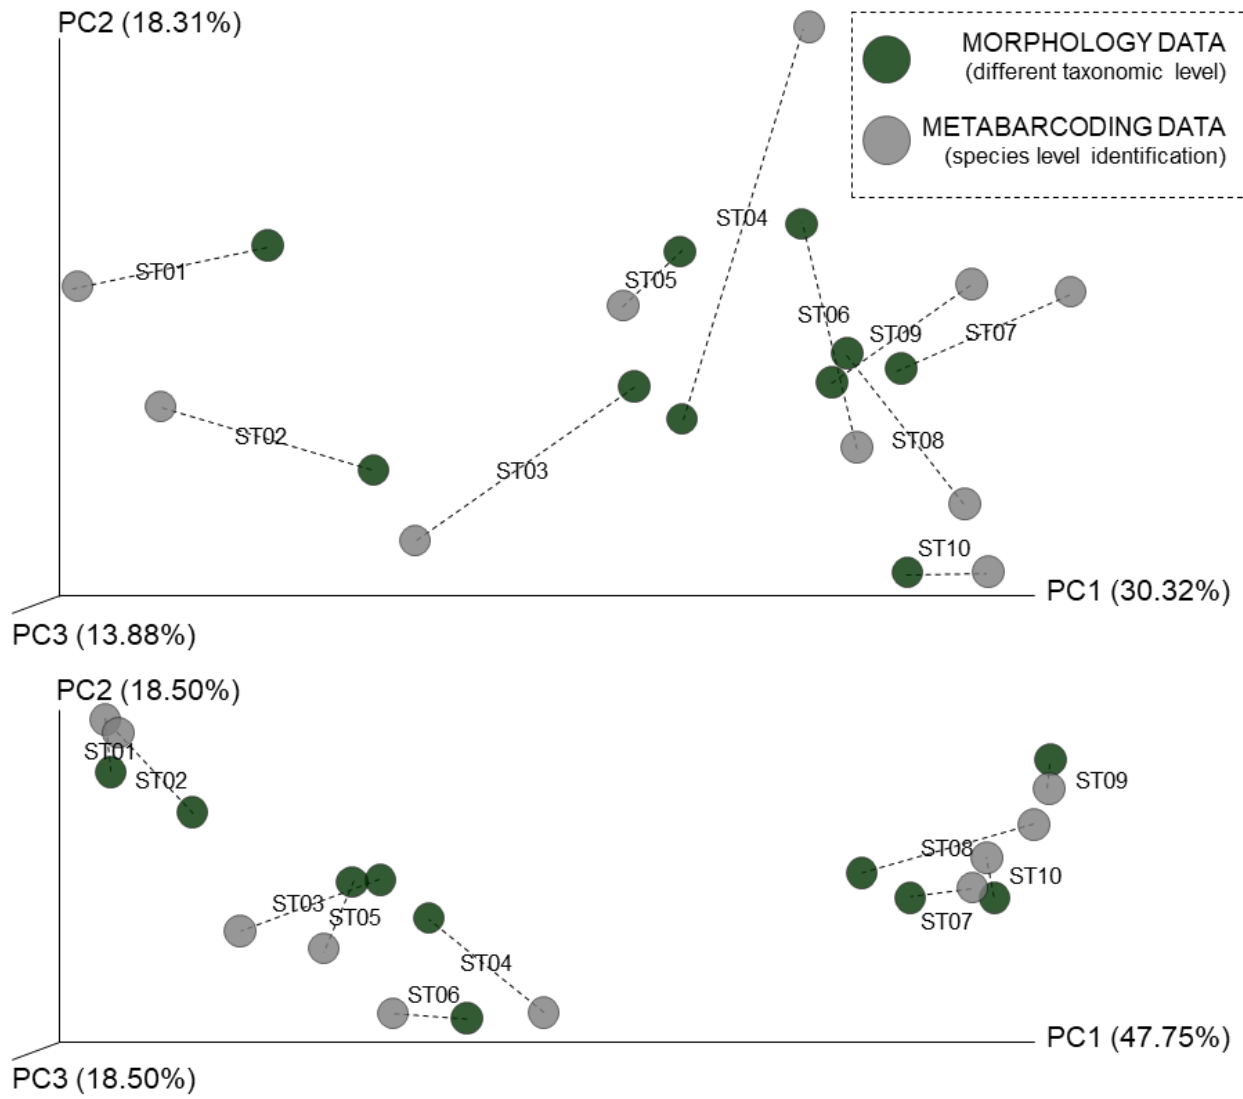

560

561 Figure 3. Principal coordinate analysis (PCoA) ordinations of beta diversity estimates (coords scaled by percent explained): Binary-  
562 Jaccard (Procrustes:  $p$ -value = 0.038) (top) and Bray-Curtis dissimilarity (Procrustes:  $p$ -value < 0.001) (bottom).

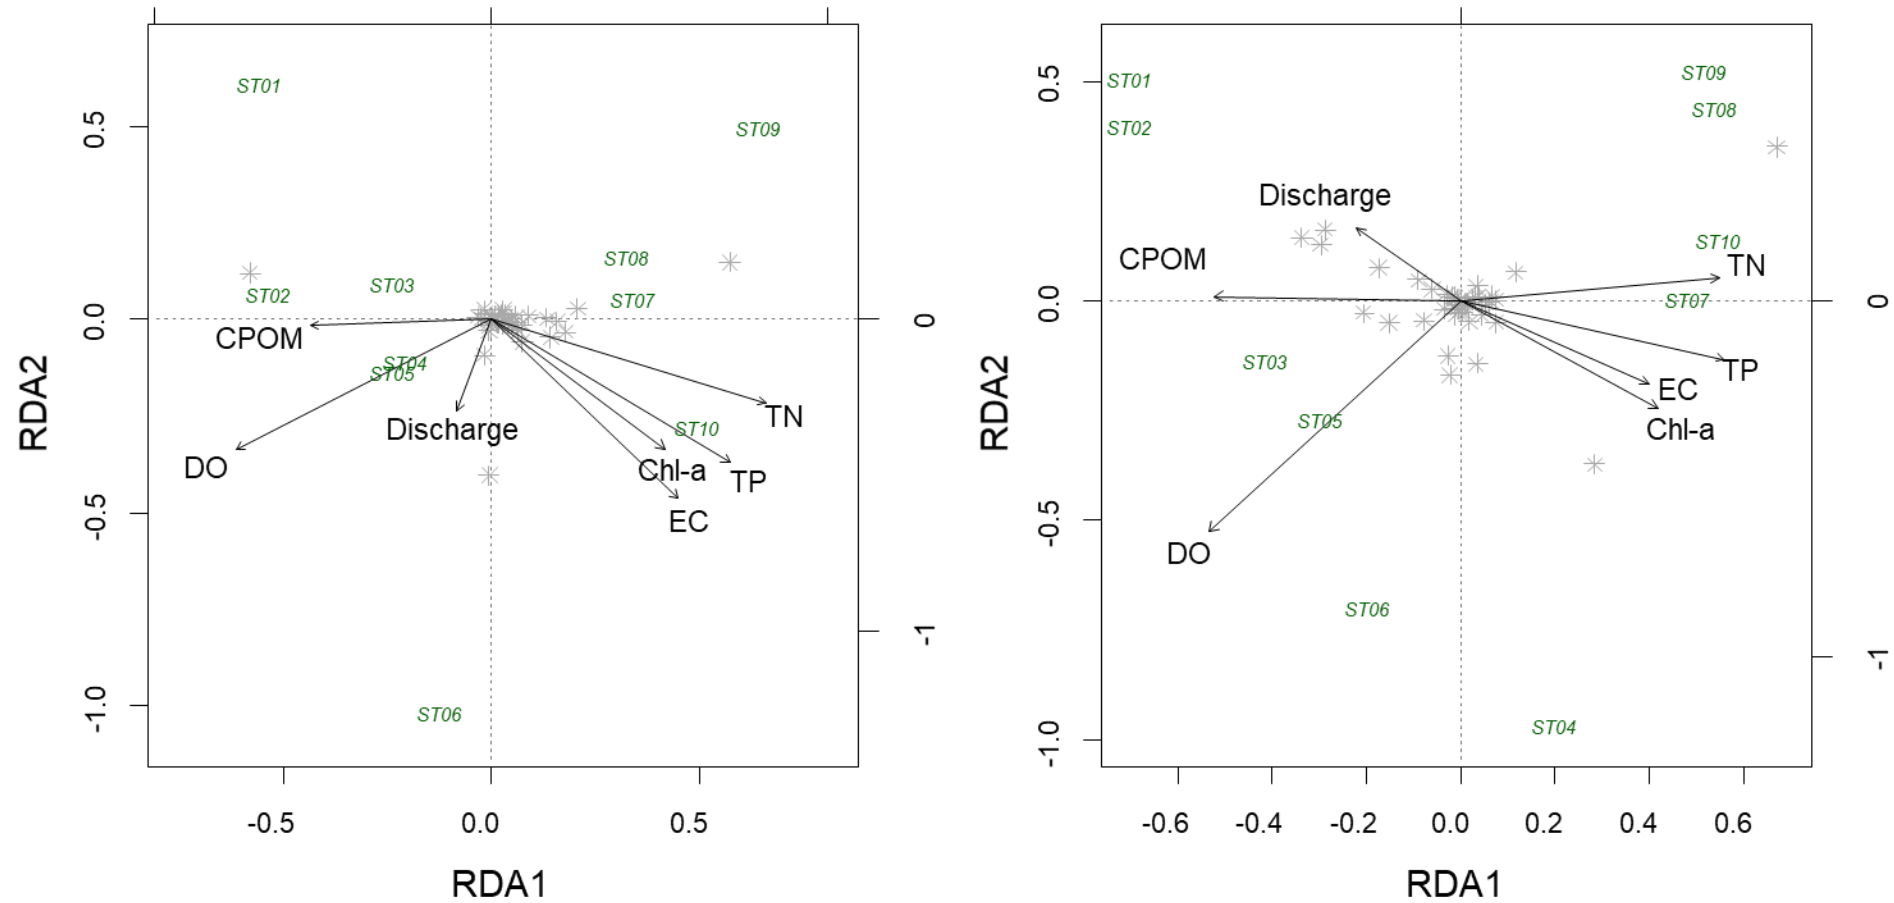

565 Figure 4. Redundancy analysis (RDA) ordination plot of the morphologically-identified taxa (left) and metabarcoding-identified macroinvertebrate species (right) constrained by environmental variables.  
 566 Both global models were found to be statistically significant following a permutation ANOVA test ( $p = 0.035$ ,  $p < 0.001$  respectively). “Chl-a” stands for chlorophyll a, “CPOM” for the coarse particulate  
 567 organic matter, “DO” for dissolved oxygen, “EC” for conductivity, “TN” for total nitrogen and “TP” for total phosphorus.



**Tables**

Table 1. Summary of altitude, DNA metabarcoding data, and species richness across the ten study sites.

| Study site   | Sample Size  | Read Processing |                      |           | Metabarcoding                |              |           | Morpho-taxa | Meta-taxa (Match) | False Positive | False Negative | Correlation Analysis |                |             |
|--------------|--------------|-----------------|----------------------|-----------|------------------------------|--------------|-----------|-------------|-------------------|----------------|----------------|----------------------|----------------|-------------|
|              |              | Raw Reads       | Reads Mapped to OTUs | OTUs      | Arthropod Reads <sup>a</sup> | Meta-species | Meta-taxa |             |                   |                |                | Pr > F <sup>b</sup>  | R <sup>2</sup> | R           |
| Site 01      | 603          | 18,867          | 10,593               | 14        | 4,338                        | 13           | 3         | 5           | 2                 | 1              | 3              | 0.03                 | 0.73           | 0.85        |
| Site 02      | 228          | 31,300          | 15,371               | 15        | 11,704                       | 14           | 6         | 7           | 3                 | 3              | 4              | 0.03                 | 0.48           | 0.69        |
| Site 03      | 208          | 8,593           | 4,941                | 24        | 2,520                        | 20           | 8         | 9           | 5                 | 3              | 4              | 0.10 <sup>c</sup>    | 0.24           | 0.49        |
| Site 04      | 551          | 15,033          | 4,797                | 14        | 3,987                        | 12           | 9         | 12          | 5                 | 4              | 7              | 0.49 <sup>c</sup>    | 0.03           | 0.18        |
| Site 05      | 1,347        | 12,598          | 5,792                | 28        | 3,534                        | 25           | 9         | 14          | 6                 | 3              | 8              | 0.08 <sup>c</sup>    | 0.19           | 0.44        |
| Site 06      | 1,051        | 31,291          | 14,848               | 30        | 11,837                       | 24           | 10        | 16          | 6                 | 4              | 10             | 0.01                 | 0.34           | 0.58        |
| Site 07      | 539          | 17,510          | 7,304                | 24        | 4,957                        | 20           | 12        | 20          | 8                 | 4              | 12             | 0.21 <sup>c</sup>    | 0.06           | 0.25        |
| Site 08      | 2,740        | 10,626          | 4,944                | 26        | 2,802                        | 21           | 12        | 25          | 8                 | 4              | 17             | 0.01                 | 0.25           | 0.5         |
| Site 09      | 843          | 8,784           | 5,106                | 28        | 1,462                        | 22           | 9         | 22          | 6                 | 3              | 16             | 0                    | 0.39           | 0.62        |
| Site 10      | 166          | 10,906          | 6,206                | 15        | 500                          | 13           | 6         | 27          | 5                 | 1              | 22             | 0.03                 | 0.17           | 0.41        |
| <b>Total</b> | <b>8,276</b> | <b>165,508</b>  | <b>79,902</b>        | <b>53</b> | <b>47,641</b>                | <b>44</b>    | <b>20</b> | <b>45</b>   | <b>11</b>         | <b>9</b>       | <b>34</b>      | <b>0.001</b>         | <b>0.18</b>    | <b>0.43</b> |

<sup>a</sup> arthropod sequence match at >97% identity and e-value >10<sup>-5</sup> identified to the species level in GenBank.

<sup>b</sup> including false positive and false negative detection.

<sup>c</sup> no significant correlation with p-value > 0.05.

571  
572

Table 2. Absolute abundances of macroinvertebrates based on morphological identification (morpho-taxa) and metabarcoding sequence reads (meta-taxa). The correlations between these are shown in Figure 2.

| Order           | Family             | Genus                        | Taxon                                     | Abundance    | Reads         |
|-----------------|--------------------|------------------------------|-------------------------------------------|--------------|---------------|
| Ephemeroptera   | Baetidae           | <i>Acentrella</i>            | <i>Acentrella</i>                         | 108          | -             |
|                 | Baetidae           | <i>Baetis</i>                | <i>Baetis</i>                             | 2,203        | 6,466         |
|                 | Baetidae           | <i>Cloeon</i>                | <i>Cloeon ryogokuense</i>                 | 2            | -             |
|                 | Baetidae           | <i>Labiobaetis</i>           | <i>Labiobaetis atrebatinus orientalis</i> | -            | 187           |
|                 | Baetidae           | <i>Procloeon</i>             | <i>Procloeon</i>                          | 1            | -             |
|                 | Baetidae           | <i>Tenuibaetis</i>           | <i>Tenuibaetis flexifemora</i>            | -            | 787           |
|                 | Caenidae           | <i>Caenis</i>                | <i>Caenis</i>                             | 6            | -             |
|                 | Ephemerellidae     | <i>Drunella</i>              | <i>Drunella basalis</i>                   | 1            | -             |
|                 | Ephemerellidae     | <i>Ephemerella</i>           | <i>Ephemerella</i>                        | 66           | 280           |
|                 | Ephemerellidae     | <i>Torleya</i>               | <i>Torleya</i>                            | 1            | -             |
|                 | Ephemerellidae     | <i>Uracanthella</i>          | <i>Uracanthella</i>                       | 22           | -             |
|                 | Ephemeridae        | <i>Ephemerella</i>           | <i>Ephemerella</i>                        | 2            | -             |
|                 | Heptageniidae      | <i>Afronus</i>               | <i>Afronus</i>                            | 94           | 1,922         |
|                 | Heptageniidae      | <i>Cinygmula</i>             | <i>Cinygmula</i>                          | 3            | -             |
|                 | Heptageniidae      | <i>Epeorus</i>               | <i>Epeorus latifolium</i>                 | 40           | 5,207         |
|                 | Heptageniidae      | <i>Rhithrogena</i>           | <i>Rhithrogena</i>                        | 153          | 32            |
| Leptophlebiidae | <i>Choroterpes</i> | <i>Choroterpes</i>           | 16                                        | -            |               |
| Plecoptera      | Chloroperlidae     | —                            | <i>Chloroperlidae</i>                     | 6            | -             |
|                 | Gripopterygidae    | <i>Aucklandobius</i>         | <i>Aucklandobius gressitti</i>            | -            | 218           |
|                 | Nemouridae         | <i>Amphinemura</i>           | <i>Amphinemura</i>                        | 2            | -             |
|                 | Perlidae           | <i>Kamimuria</i>             | <i>Kamimuria</i>                          | 2            | -             |
|                 | Perlidae           | —                            | <i>Perlinae</i>                           | 14           | -             |
|                 | Perlodidae         | <i>Isoperla</i>              | <i>Isoperla</i>                           | 6            | -             |
| Trichoptera     | Glossosomatidae    | <i>Glossosoma</i>            | <i>Glossosoma ussuricum</i>               | -            | 20            |
|                 | Goeridae           | <i>Goera</i>                 | <i>Goera</i>                              | 2            | 8             |
|                 | Hydropsychidae     | <i>Ceratopsyche</i>          | <i>Ceratopsyche orientalis</i>            | -            | 463           |
|                 | Hydropsychidae     | <i>Cheumatopsyche</i>        | <i>Cheumatopsyche</i>                     | 32           | 58            |
|                 | Hydropsychidae     | <i>Hydropsyche</i>           | <i>Hydropsyche</i>                        | 6            | -             |
|                 | Hydroptilidae      | <i>Hydroptila</i>            | <i>Hydroptila</i>                         | 158          | -             |
|                 | Lepidostomatidae   | <i>Lepidostoma</i>           | <i>Lepidostoma</i>                        | 24           | -             |
|                 | Limnephilidae      | <i>Hydatophylax</i>          | <i>Hydatophylax soldatovi</i>             | -            | 436           |
|                 | Psychomyiidae      | <i>Lype</i>                  | <i>Lype</i>                               | 1            | -             |
|                 | Psychomyiidae      | <i>Psychomyia</i>            | <i>Psychomyia</i>                         | 1            | -             |
|                 | Rhyacophilidae     | <i>Rhyacophila</i>           | <i>Rhyacophila</i>                        | 4            | -             |
| Stenopsychidae  | <i>Stenopsyche</i> | <i>Stenopsyche marmorata</i> | 8                                         | 585          |               |
| Diptera         | Athericidae        | <i>Asuragina</i>             | <i>Athericidae</i>                        | 1            | -             |
|                 | Chironomidae       | —                            | <i>Chironominae</i>                       | 3,144        | 20,145        |
|                 | Chironomidae       | —                            | <i>Orthocladinae</i>                      | 1,639        | 10,662        |
|                 | Chironomidae       | —                            | <i>Tanypodinae</i>                        | 306          | 129           |
|                 | Muscidae           | <i>Lispe</i>                 | <i>Lispe tentaculata</i>                  | -            | 19            |
|                 | Tipulidae          | <i>Antocha</i>               | <i>Antocha</i>                            | 4            | -             |
|                 | Tipulidae          | <i>Hexatoma</i>              | <i>Hexatoma</i>                           | 4            | -             |
| Coleoptera      | Elmidae            | <i>Elminae</i>               | <i>Elminae</i>                            | 35           | -             |
|                 | Elmidae            | <i>Zaitzevia</i>             | <i>Zaitzevia</i>                          | 1            | -             |
|                 | Elmidae            | <i>Zaitzeviaria</i>          | <i>Zaitzeviaria</i>                       | 3            | -             |
|                 | Hydrophilidae      | <i>Laccobius</i>             | <i>Laccobius</i>                          | 4            | -             |
|                 | Hydroporinae       | —                            | <i>Hydroporinae</i>                       | 28           | -             |
|                 | Psephenidae        | <i>Ectopria</i>              | <i>Psephenidae</i>                        | 1            | -             |
| Odonata         | Gomphidae          | <i>Davidius</i>              | <i>Davidius nanus</i>                     | -            | 11            |
|                 | Gomphidae          | <i>Onychogomphus</i>         | <i>Onychogomphus</i>                      | 1            | -             |
| Amphipoda       | Crangonyctidae     | <i>Crangonyx</i>             | <i>Crangonyx floridanus</i>               | 2            | -             |
|                 | Gammaridae         | <i>Pseudocrangonyx</i>       | <i>Pseudocrangonyx</i>                    | 1            | -             |
| Isopoda         | Asellidae          | <i>Asellus</i>               | <i>Asellus</i>                            | 118          | -             |
| Podocopida      | Cyprididae         | <i>Eucypris</i>              | <i>Eucypris virens</i>                    | -            | 6             |
| <b>Total</b>    | —                  | —                            | —                                         | <b>8,276</b> | <b>47,641</b> |

573
